# Supplementary material for: Analyses of starch biosynthetic protein complexes and starch properties from developing mutant rice seeds with minimal starch synthase activities
Source: Springer Nature journal article supplement (doi:10.1186/s12870-018-1270-0), 2018-04-10

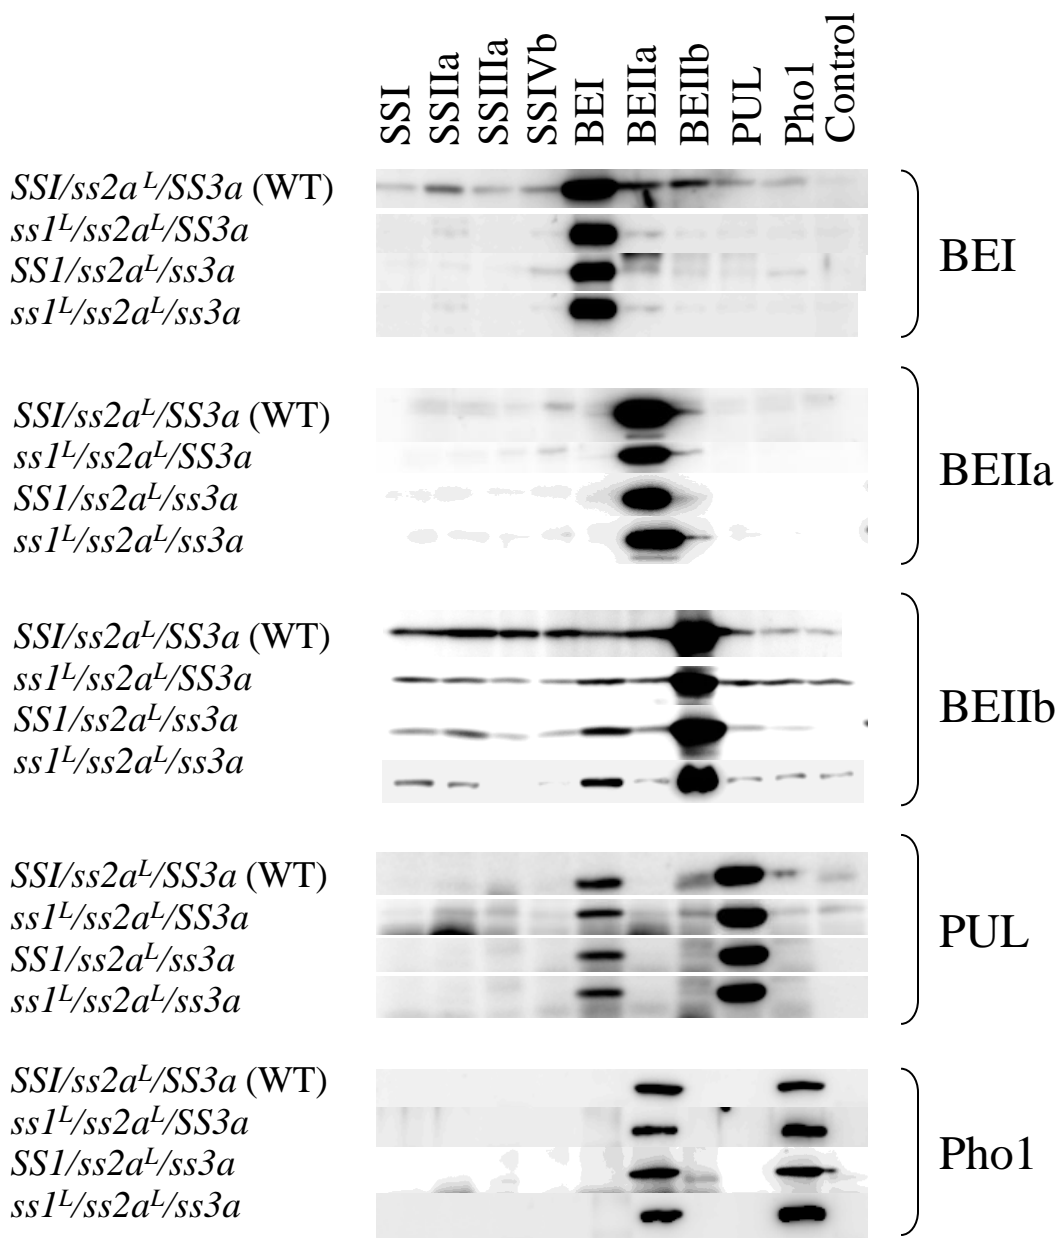

Supplement: 12870_2018_1270_MOESM4_ESM.pdf [file 12870_2018_1270_MOESM4_ESM.pdf]
