# Supplementary material for: Analyses of starch biosynthetic protein complexes and starch properties from developing mutant rice seeds with minimal starch synthase activities
Source: Springer Nature journal article supplement (doi:10.1186/s12870-018-1270-0), 2018-04-10

**A** *SSI/ss2a<sup>L</sup>/SS3a* (WT)

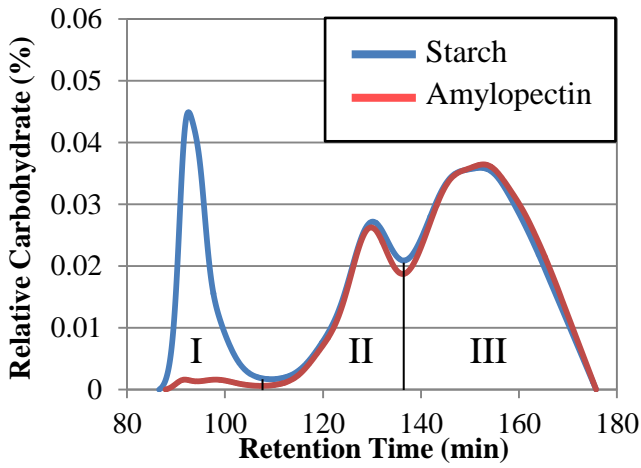

**B** *ss1<sup>L</sup>/ss2a<sup>L</sup>/SS3a*

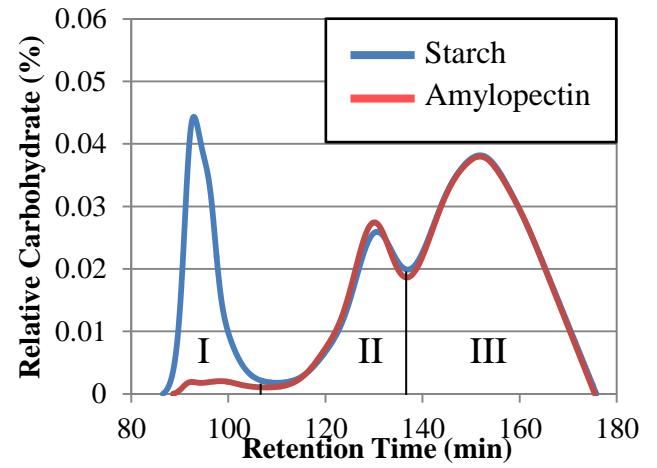

**C** *SSI/ss2a<sup>L</sup>/ss3a*

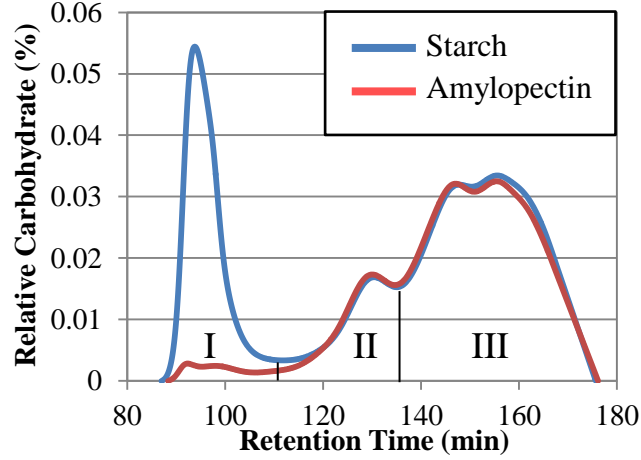

**D** *ss1<sup>L</sup>/ss2a<sup>L</sup>/ss3a*

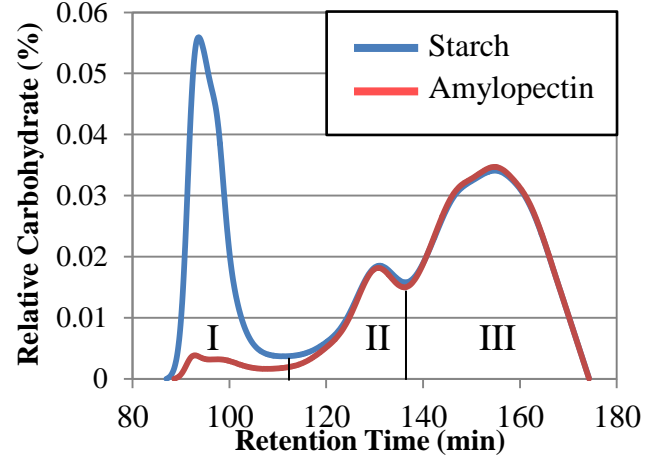

Supplement: 12870_2018_1270_MOESM5_ESM.pdf [file 12870_2018_1270_MOESM5_ESM.pdf]
